# Supplementary material for: Gut microbiota and fecal short chain fatty acids differ with adiposity and country of origin: the METS-microbiome study
Source: PubMed Central journal article supplement (PMC10449869; doi:10.1038/s41467-023-40874-x), 2023-08-24
Supplement: 41467_2023_40874_MOESM1_ESM.pdf [file 41467_2023_40874_MOESM1_ESM.pdf]

## Supplementary Information

### **Gut microbiota and fecal short chain fatty acids differ with adiposity and country of origin: The METS-Microbiome Study**

Gertrude Ecklu-Mensah<sup>1\*</sup>, Candice Choo-Kang<sup>2\*</sup>, Maria Gjerstad Maseng<sup>3,4,5</sup>, Sonya Donato<sup>1</sup>, Pascal Bovet<sup>6, 7</sup>, Bharathi Viswanathan<sup>7</sup>, Kweku Bedu-Addo<sup>8</sup>, Jacob Plange-Rhule<sup>8</sup>, Prince Oti Boateng<sup>8</sup>, Terrence E. Forrester<sup>9</sup>, Marie Williams<sup>9</sup>, Estelle V. Lambert<sup>10</sup>, Dale Rae<sup>10</sup>, Nandipha Sinyanya<sup>10</sup>, Amy Luke<sup>2</sup>, Brian T. Layden<sup>11,12</sup>, Stephen O'Keefe<sup>13</sup>, Jack A. Gilbert<sup>1\*\*</sup>, Lara R. Dugas<sup>2, 14\*\*</sup>

<sup>1</sup>Department of Pediatrics, Center for Microbiome Innovation, University of California San Diego, La Jolla, CA, USA

<sup>2</sup> Public Health Sciences, Parkinson School of Health Sciences and Public Health, Loyola University Chicago, Maywood, IL, USA

<sup>3</sup> Institute of Clinical Medicine, Faculty of Medicine, University of Oslo, Oslo, Norway

<sup>4</sup> Dep. of Gastroenterology, Oslo University Hospital, Oslo, Norway

<sup>5</sup> Bio-Me, Oslo, Norway

<sup>6</sup> University Center for Primary Care and Public Health (Unisanté), Lausanne University Hospital, Lausanne, Switzerland

<sup>7</sup> Ministry of Health, Victoria, Republic of Seychelles

<sup>8</sup>Department of Physiology, SMS, Kwame Nkrumah University of Science and Technology, Kumasi, Ghana

<sup>9</sup>Solutions for Developing Countries, University of the West Indies, Mona, Kingston, Jamaica

<sup>10</sup>Research Unit for Exercise Science and Sports Medicine, University of Cape Town, Cape Town, South Africa

<sup>11</sup>Department of Medicine, University of Illinois at Chicago, Chicago, Illinois, USA

<sup>12</sup>Jesse Brown Veterans Affairs Medical Center, Chicago, Illinois, USA.

<sup>13</sup>Department of Medicine, University of Pittsburgh, PA, USA

<sup>14</sup>Division of Epidemiology and Biostatistics, School of Public Health, Faculty of Health Sciences, University of Cape Town, Cape Town, South Africa.

**Supplementary Table 1. Alpha diversity between obese and non-obese groups**

| Country      | non-Obese | Obese | Observed ASVs | Shannon | Faith's PD |
|--------------|-----------|-------|---------------|---------|------------|
|              |           |       | P             | P       | P          |
| Ghana        | 243       | 89    | 0.0439        | 0.268   | 0.0393     |
| South Africa | 233       | 141   | 0.0488        | 0.0686  | 0.12       |
| Jamaica      | 208       | 179   | 0.338         | 0.494   | 0.239      |
| Seychelles   | 217       | 147   | 0.206         | 0.752   | 0.186      |
| USA          | 112       | 195   | 0.759         | 0.246   | 0.901      |

Alpha diversity estimated by Shannon, Observed ASVs and Faith's PD (Phylogenetic Diversity) between obese and non-obese in each country (Wilcoxon rank sum test; two-sided). Statistical significance adjusted for multiple comparisons using false discovery rate (FDR) correction are presented. Statistical significance,  $p < 0.05$ .  $n = 1764$  samples. Source data are provided as a Source Data file. Exact p-values are provided.

**Supplementary Table 2. Gut microbiota Beta Diversity**

| Weighted UniFrac Distance   |                |       |                |       |                |       |                |       |                |       |                |       |
|-----------------------------|----------------|-------|----------------|-------|----------------|-------|----------------|-------|----------------|-------|----------------|-------|
|                             | Overall        |       | Ghana          |       | South Africa   |       | Jamaica        |       | Seychelles     |       | USA            |       |
|                             | R <sup>2</sup> | P     | R <sup>2</sup> | P     | R <sup>2</sup> | P     | R <sup>2</sup> | P     | R <sup>2</sup> | P     | R <sup>2</sup> | P     |
| Obese                       | 0.001          | 0.031 | 0.004          | 0.208 | 0.003          | 0.415 | 0.002          | 0.732 | 0.001          | 0.903 | 0.007          | 0.043 |
| Sex                         | 0.003          | 0.001 | 0.002          | 0.549 | 0.004          | 0.19  | 0.009          | 0.009 | 0.023          | 0.001 | 0.011          | 0.004 |
| Age                         | 0.002          | 0.001 | 0.101          | 0.815 | 0.08           | 0.737 | 0.102          | 0.062 | 0.053          | 0.894 | 0.098          | 0.283 |
| Country                     | 0.118          | 0.001 |                |       |                |       |                |       |                |       |                |       |
| Unweighted UniFrac Distance |                |       |                |       |                |       |                |       |                |       |                |       |
|                             | overall        |       | Ghana          |       | South Africa   |       | Jamaica        |       | Seychelles     |       | USA            |       |
|                             | R <sup>2</sup> | P     | R <sup>2</sup> | P     | R <sup>2</sup> | P     | R <sup>2</sup> | P     | R <sup>2</sup> | P     | R <sup>2</sup> | P     |
| Obese                       | 0.003          | 0.001 | 0.004          | 0.032 | 0.007          | 0.002 | 0.002          | 0.732 | 0.003          | 0.279 | 0.004          | 0.154 |
| Sex                         | 0.003          | 0.001 | 0.005          | 0.018 | 0.007          | 0.002 | 0.009          | 0.009 | 0.01           | 0.001 | 0.01           | 0.001 |
| Age                         | 0.001          | 0.135 | 0.113          | 0.471 | 0.083          | 0.708 | 0.102          | 0.062 | 0.063          | 0.576 | 0.094          | 0.252 |
| Country                     | 0.083          | 0.001 |                |       |                |       |                |       |                |       |                |       |

Adjusted multivariable analysis in the entire cohort (overall) and by each country. Statistical significance from permutational multivariate analysis of variance (PERMANOVA, two-tailed test,  $p < 0.05$ ).  $n = 1764$  samples. All p-values are generated based on 999 permutations and exact p-values are provided.

**Supplementary Table 3 – Description of study participants by microbial enterotypes**

|                    | <i>Bacteroides</i> type | <i>Prevotella</i> type | p-value | q-value |
|--------------------|-------------------------|------------------------|---------|---------|
| N                  | 820                     | 866                    |         |         |
| BMI                | 29(25,35)               | 28(23,34)              | 0.003   | 0.004   |
| Country            |                         |                        | <0.001  | <0.001  |
| Ghana              | 61 (7.4%)               | 265(31%)               |         |         |
| Jamaica            | 243(30%)                | 117(14%)               |         |         |
| Seychelles         | 149(18%)                | 176(20%)               |         |         |
| South Africa       | 142(17%)                | 232(27%)               |         |         |
| USA                | 225(27%)                | 76(8.8%)               |         |         |
| Sex                | 564(69%)                | 503(58%)               | <0.001  | <0.001  |
| Age                | 44(38,50)               | 42(36,48)              | 0.032   | 0.032   |
| Obese              | 370(45%)                | 346(40%)               | <0.001  | <0.001  |
| Total SCFA         | 3547(2325,4891)         | 5300(3591,7672)        | <0.001  | <0.001  |
| <i>Bacteroides</i> | 1299(315,7521)          | 92(18,526)             | <0.001  | <0.001  |
| <i>Prevotella</i>  | 98(25,319)              | 1246(198,10382)        | <0.001  | <0.001  |

Data are presented as median (interquartile range) for continuous variables and percentages (%) for categorical variables. n= 1686 samples. p values are based on Wilcoxon rank-sum test or Pearson's Chi-squared test (two-tailed). Exact q values are shown. Source data are provided as a Source Data file. Statistical significance, q < 0.05. q = False Discovery Rate correction, BMI = Body Mass Index, SCFA = short chain fatty acids

**Supplementary Table 4. Confusion matrix table showing the average prediction accuracy of gut microbiota in estimating the different countries using a Random Forest model**

|                   | Prediction label |              |         |            |      | Overall accuracy |
|-------------------|------------------|--------------|---------|------------|------|------------------|
|                   | Ghana            | South Africa | Jamaica | Seychelles | USA  |                  |
| Ghana             | 0.88             | 0.03         | 0.02    | 0.05       | 0.03 |                  |
| South Africa      | 0.03             | 0.77         | 0.04    | 0.13       | 0.03 |                  |
| Jamaica           | 0                | 0.1          | 0.88    | 0          | 0.03 |                  |
| Seychelles        | 0.03             | 0.03         | 0.06    | 0.82       | 0.06 |                  |
| USA               | 0                | 0.03         | 0.07    | 0.05       | 0.85 |                  |
| Overall accuracy  |                  |              |         |            |      | 0.84             |
| Baseline accuracy |                  |              |         |            |      | 0.22             |
| Accuracy ratio    |                  |              |         |            |      | 3.79             |

n=1694

**Supplementary Table 5. Confusion matrix table showing the average prediction accuracy of gut microbiota in a Random Forest model**

|                   | Predicted label  |                  | Overall accuracy |
|-------------------|------------------|------------------|------------------|
|                   | Diabetic         | Non-Diabetic     |                  |
| Diabetic          | 0                | 1                |                  |
| Non-Diabetic      | 0                | 1                |                  |
| Overall accuracy  |                  |                  | 0.89             |
| Baseline accuracy |                  |                  | 0.89             |
| Accuracy ratio    |                  |                  | 1                |
|                   | Predicted label  |                  | Overall accuracy |
|                   | Elevated glucose | Normal glucose   |                  |
| Elevated glucose  | 0                | 1                |                  |
| Normal glucose    | 0.01             | 0.99             |                  |
| Overall accuracy  |                  |                  | 0.75             |
| Baseline accuracy |                  |                  | 0.76             |
| Accuracy ratio    |                  |                  | 0.99             |
|                   | Predicted label  |                  | Overall accuracy |
|                   | Hypertensive     | Non-Hypertensive |                  |
| Hypertensive      | 0.67             | 0.33             |                  |
| Non-Hypertensive  | 0.47             | 0.53             |                  |
| Overall accuracy  |                  |                  | 0.6              |
| Baseline accuracy |                  |                  | 0.5              |
| Accuracy ratio    |                  |                  | 1.2              |
|                   | Predicted label  |                  | Overall accuracy |
|                   | Obese            | Non-Obese        |                  |
| Obese             | 0.38             | 0.62             |                  |
| Non-Obese         | 0.19             | 0.81             |                  |
| Overall accuracy  |                  |                  | 0.63             |
| Baseline accuracy |                  |                  | 0.58             |
| Accuracy ratio    |                  |                  | 1.09             |
|                   | Predicted label  |                  | Overall accuracy |
|                   | Female           | Male             |                  |
| Female            | 0.94             | 0.06             |                  |
| Male              | 0.7              | 0.3              |                  |
| Overall accuracy  |                  |                  | 0.7              |
| Baseline accuracy |                  |                  | 0.63             |
| Accuracy ratio    |                  |                  | 1.11             |

Prediction accuracy for estimating diabetes status (n=1657); glucose status (n=1657); hypertensive status (1694); obese status (n = 1694); sex (n=1694) in the entire cohort is presented.

**Supplementary Table 6. The classification accuracy of gut microbiota for estimating metabolic disease indicators using a Random Forest model at each study site**

|                 | Diabetes<br>Status | Glucose<br>Status | HTN<br>Status | Sex  |
|-----------------|--------------------|-------------------|---------------|------|
| Ghana           | 0.69               | 0.55              | 0.63          | 0.76 |
| South<br>Africa | 0.57               | 0.78              | 0.54          | 0.74 |
| Jamaica         | 0.66               | 0.58              | 0.56          | 0.63 |
| Seychelles      | 0.54               | 0.56              | 0.48          | 0.75 |
| USA             | 0.53               | 0.59              | 0.47          | 0.66 |

Classification accuracy is presented as average area under the curve (AUC) values.  
HTN = Hypertension.

**Supplementary Table 7. Confusion matrix table showing the average prediction accuracy of gut microbiota for estimating metabolic disease indicators in the Ghanaian cohort using a Random Forest model**

|                   | Predicted value  |                  | Overall accuracy |
|-------------------|------------------|------------------|------------------|
|                   | Diabetic         | Non-Diabetic     |                  |
| Diabetic          | 0                | 1                |                  |
| Non-Diabetic      | 0                | 1                |                  |
| Overall accuracy  |                  |                  | 0.93             |
| Baseline accuracy |                  |                  | 0.93             |
| Accuracy ratio    |                  |                  | 1                |
|                   | Elevated glucose | Normal glucose   | Overall accuracy |
|                   |                  |                  |                  |
| Elevated glucose  | 0                | 1                |                  |
| Normal glucose    | 0                | 1                |                  |
| Overall accuracy  |                  |                  | 0.72             |
| Baseline accuracy |                  |                  | 0.72             |
| Accuracy ratio    |                  |                  | 1                |
|                   | Hypertensive     | Non-Hypertensive | Overall accuracy |
|                   |                  |                  |                  |
| Hypertensive      | 0.24             | 0.76             |                  |
| Non-Hypertensive  | 0.05             | 0.95             |                  |
| Overall accuracy  |                  |                  | 0.75             |
| Baseline accuracy |                  |                  | 0.72             |
| Accuracy ratio    |                  |                  | 1.05             |
|                   | Obese            | Non-Obese        | Overall accuracy |
|                   |                  |                  |                  |
| Obese             | 0                | 1                |                  |
| Non-Obese         | 0.02             | 0.98             |                  |
| Overall accuracy  |                  |                  | 0.72             |
| Baseline accuracy |                  |                  | 0.73             |
| Accuracy ratio    |                  |                  | 0.98             |
|                   | Female           | Male             | Overall accuracy |
|                   |                  |                  |                  |
| Female            | 0.9              | 0.1              |                  |
| Male              | 0.8              | 0.2              |                  |
| Overall accuracy  |                  |                  | 0.67             |
| Baseline accuracy |                  |                  | 0.67             |
| Accuracy ratio    |                  |                  | 1                |

**Supplementary Table 8. Confusion matrix table showing the average prediction accuracy of gut microbiota for estimating metabolic disease indicators in the South African cohort using a Random Forest model**

|                   | Predicted value  |                  | Overall accuracy |
|-------------------|------------------|------------------|------------------|
|                   | Diabetic         | Non-Diabetic     |                  |
| Diabetic          | 0                | 1                |                  |
| Non-Diabetic      | 0                | 1                |                  |
| Overall accuracy  |                  |                  | 0.96             |
| Baseline accuracy |                  |                  | 0.96             |
| Accuracy ratio    |                  |                  | 1                |
|                   | Elevated glucose | Normal glucose   | Overall accuracy |
| Elevated glucose  | 0                | 1                |                  |
| Normal glucose    | 0                | 1                |                  |
| Overall accuracy  |                  |                  | 0.92             |
| Baseline accuracy |                  |                  | 0.92             |
| Accuracy ratio    |                  |                  | 1                |
|                   | Hypertensive     | Non-Hypertensive | Overall accuracy |
| Hypertensive      | 0.16             | 0.84             |                  |
| Non-Hypertensive  | 0.25             | 0.75             |                  |
| Overall accuracy  |                  |                  | 0.51             |
| Baseline accuracy |                  |                  | 0.59             |
| Accuracy ratio    |                  |                  | 0.86             |
|                   | Obese            | Non-Obese        | Overall accuracy |
| Obese             | 0.14             | 0.86             |                  |
| Non-Obese         | 0.15             | 0.85             |                  |
| Overall accuracy  |                  |                  | 0.59             |
| Baseline accuracy |                  |                  | 0.63             |
| Accuracy ratio    |                  |                  | 0.94             |
|                   | Female           | Male             | Overall accuracy |
| Female            | 0.86             | 0.14             |                  |
| Male              | 0.58             | 0.42             |                  |
| Overall accuracy  |                  |                  | 0.68             |
| Baseline accuracy |                  |                  | 0.59             |
| Accuracy ratio    |                  |                  | 1.16             |

**Supplementary Table 9. Confusion matrix table showing the average prediction accuracy of gut microbiota for estimating metabolic disease indicators in the Jamaican cohort using a Random Forest model**

|                   | Predicted label  |                  | Overall accuracy |
|-------------------|------------------|------------------|------------------|
|                   | Diabetic         | Non-Diabetic     |                  |
| Diabetic          | 0                | 1                |                  |
| Non-Diabetic      | 0                | 1                |                  |
| Overall accuracy  |                  |                  | 0.9              |
| Baseline accuracy |                  |                  | 0.9              |
| Accuracy ratio    |                  |                  | 1                |
|                   | Elevated glucose | Normal glucose   | Overall accuracy |
|                   |                  |                  |                  |
| Elevated glucose  | 0                | 1                |                  |
| Normal glucose    | 0                | 1                |                  |
| Overall accuracy  |                  |                  | 0.8              |
| Baseline accuracy |                  |                  | 0.8              |
| Accuracy ratio    |                  |                  | 1                |
|                   | Hypertensive     | Non-Hypertensive | Overall accuracy |
|                   |                  |                  |                  |
| Hypertensive      | 0.92             | 0.08             |                  |
| Non-Hypertensive  | 0.84             | 0.16             |                  |
| Overall accuracy  |                  |                  | 0.58             |
| Baseline accuracy |                  |                  | 0.55             |
| Accuracy ratio    |                  |                  | 1.05             |
|                   | Obese            | Non-Obese        | Overall accuracy |
|                   |                  |                  |                  |
| Obese             | 0.41             | 0.59             |                  |
| Non-Obese         | 0.36             | 0.64             |                  |
| Overall accuracy  |                  |                  | 0.53             |
| Baseline accuracy |                  |                  | 0.53             |
| Accuracy ratio    |                  |                  | 1                |
|                   | Female           | Male             | Overall accuracy |
|                   |                  |                  |                  |
| Female            | 0.91             | 0.01             |                  |
| Male              | 0.88             | 0.12             |                  |
| Overall accuracy  |                  |                  | 0.65             |
| Baseline accuracy |                  |                  | 0.66             |
| Accuracy ratio    |                  |                  | 0.98             |



**Supplementary Table 10. Confusion matrix table showing the average prediction accuracy of gut microbiota for estimating metabolic disease indicators in the Seychellois cohort using a Random Forest model**

|                   | Predicted label  |                  | Overall accuracy |
|-------------------|------------------|------------------|------------------|
|                   | Diabetic         | Non-Diabetic     |                  |
| Diabetic          | 0                | 1                |                  |
| Non-Diabetic      | 0                | 1                |                  |
| Overall accuracy  |                  |                  | 0.83             |
| Baseline accuracy |                  |                  | 0.83             |
| Accuracy ratio    |                  |                  | 1                |
|                   | Elevated glucose | Normal glucose   | Overall accuracy |
|                   |                  |                  |                  |
| Elevated glucose  | 0.53             | 0.47             |                  |
| Normal glucose    | 0.53             | 0.47             |                  |
| Overall accuracy  |                  |                  | 0.5              |
| Baseline accuracy |                  |                  | 0.52             |
| Accuracy ratio    |                  |                  | 0.97             |
|                   | Hypertensive     | Non-Hypertensive | Overall accuracy |
|                   |                  |                  |                  |
| Hypertensive      | 0.68             | 0.32             |                  |
| Non-Hypertensive  | 0.82             | 0.18             |                  |
| Overall accuracy  |                  |                  | 0.47             |
| Baseline accuracy |                  |                  | 0.58             |
| Accuracy ratio    |                  |                  | 0.82             |
|                   | Obese            | Non-Obese        | Overall accuracy |
|                   |                  |                  |                  |
| Obese             | 0                | 1                |                  |
| Non-Obese         | 0.03             | 0.97             |                  |
| Overall accuracy  |                  |                  | 0.59             |
| Baseline accuracy |                  |                  | 0.61             |
| Accuracy ratio    |                  |                  | 0.98             |
|                   | Female           | Male             | Overall accuracy |
|                   |                  |                  |                  |
| Female            | 0.86             | 0.14             |                  |
| Male              | 0.52             | 0.48             |                  |
| Overall accuracy  |                  |                  | 0.7              |
| Baseline accuracy |                  |                  | 0.56             |
| Accuracy ratio    |                  |                  | 1.24             |

**Supplementary Table 11. Confusion matrix table showing the average prediction accuracy of gut microbiota for estimating metabolic disease indicators in the US cohort using a Random Forest model**

|                   | Predicted label  |                  | Overall accuracy |
|-------------------|------------------|------------------|------------------|
|                   | Diabetic         | Non-Diabetic     |                  |
| Diabetic          | 0                | 1                |                  |
| Non-Diabetic      | 0                | 1                |                  |
| Overall accuracy  |                  |                  | 0.8              |
| Baseline accuracy |                  |                  | 0.8              |
| Accuracy ratio    |                  |                  | 1                |
|                   | Elevated glucose | Normal glucose   | Overall accuracy |
|                   |                  |                  |                  |
| Elevated glucose  | 0                | 1                |                  |
| Normal glucose    | 0                | 1                |                  |
| Overall accuracy  |                  |                  | 0.77             |
| Baseline accuracy |                  |                  | 0.77             |
| Accuracy ratio    |                  |                  | 1                |
|                   | Hypertensive     | Non-Hypertensive | Overall accuracy |
|                   |                  |                  |                  |
| Hypertensive      | 1                | 1                |                  |
| Non-Hypertensive  | 0                | 0                |                  |
| Overall accuracy  |                  |                  | 0.69             |
| Baseline accuracy |                  |                  | 0.69             |
| Accuracy ratio    |                  |                  | 1                |
|                   | Obese            | Non-Obese        | Overall accuracy |
|                   |                  |                  |                  |
| Obese             | 0.9              | 0.1              |                  |
| Non-Obese         | 0.77             | 0.23             |                  |
| Overall accuracy  |                  |                  | 0.66             |
| Baseline accuracy |                  |                  | 0.64             |
| Accuracy ratio    |                  |                  | 1.03             |
|                   | Female           | Male             | Overall accuracy |
|                   |                  |                  |                  |
| Female            | 0.93             | 0.07             |                  |
| Male              | 0.7              | 0.3              |                  |
| Overall accuracy  |                  |                  | 0.72             |
| Baseline accuracy |                  |                  | 0.67             |
| Accuracy ratio    |                  |                  | 1.07             |

**Supplementary Table 12. Weight adjusted fecal SCFA levels by country**

| <b>WOMEN</b>             |              |              |             |             |             |
|--------------------------|--------------|--------------|-------------|-------------|-------------|
|                          | Ghana        | South Africa | Jamaica     | Seychelles  | US          |
|                          | n=254        | n=228        | n=263       | n=196       | n=213       |
| <b>PROPIONATE (UG/G)</b> | 30.4 ± 18.0  | 11.6 ± 6.9   | 11.5 ± 8.5  | 14.5 ± 8.5  | 9.1 ± 6.0   |
| <b>BUTYRATE (UG/G)</b>   | 22.1 ± 11.8  | 10.6 ± 6.6   | 8.5 ± 6.8   | 7.0 ± 5.4   | 9.0 ± 6.5   |
| <b>ACETATE (UG/G)</b>    | 61.3 ± 22.8  | 15.6 ± 7.4   | 24.4 ± 13.3 | 40.9 ± 25.4 | 16.8 ± 11.1 |
| <b>TOTAL SCFA (UG/G)</b> | 115.5 ± 45.0 | 39.5 ± 19.0  | 46.0 ± 26.3 | 63.8 ± 35.1 | 36.4 ± 21.5 |
| <b>MEN</b>               |              |              |             |             |             |
|                          | Ghana        | South Africa | Jamaica     | Seychelles  | US          |
|                          | n=117        | n=171        | n=133       | n=164       | n=107       |
| <b>PROPIONATE (UG/G)</b> | 34.3 ± 15.9  | 18.6 ± 13.1  | 18.3 ± 13.2 | 21.0 ± 13.9 | 13.1 ± 9.9  |
| <b>BUTYRATE (UG/G)</b>   | 23.1 ± 14.2  | 14.5 ± 9.0   | 13.2 ± 10.1 | 8.6 ± 4.7   | 11.3 ± 6.8  |
| <b>ACETATE (UG/G)</b>    | 68.9 ± 22.5  | 22.1 ± 9.3   | 27.0 ± 13.3 | 42.2 ± 17.2 | 22.3 ± 13.7 |
| <b>TOTAL SCFA (UG/G)</b> | 128.0 ± 44.2 | 57.3 ± 27.9  | 60.3 ± 30.1 | 72.8 ± 32.0 | 48.4 ± 27.3 |

Data are presented as mean ± standard deviation. Source data are provided as a Source Data file.

**Supplementary Table 13. Total fecal SCFA by adiposity status**

| <b>NON-OBESE</b>         |              |              |             |             |             |
|--------------------------|--------------|--------------|-------------|-------------|-------------|
|                          | Ghana        | South Africa | Jamaica     | Seychelles  | US          |
|                          | n=254        | n=228        | n=263       | n=196       | n=213       |
| <b>PROPIONATE (UG/G)</b> | 34.1 ± 18.3  | 16.8 ± 11.8  | 16.6 ± 13.0 | 19.2 ± 13.2 | 12.7 ± 9.6  |
| <b>BUTYRATE (UG/G)</b>   | 23.8 ± 13.2  | 14.3 ± 8.6   | 12.2 ± 9.7  | 8.4 ± 5.9   | 11.1 ± 7.4  |
| <b>ACETATE (UG/G)</b>    | 69.3 ± 22.4  | 21.4 ± 9.2   | 28.3 ± 15.3 | 45.9 ± 24.1 | 23.1 ± 14.2 |
| <b>TOTAL SCFA (UG/G)</b> | 129.1 ± 45.0 | 54.6 ± 26.3  | 59.0 ± 32.6 | 74.8 ± 37.6 | 48.9 ± 28.4 |
| <b>OBESE</b>             |              |              |             |             |             |
|                          | Ghana        | South Africa | Jamaica     | Seychelles  | US          |
|                          | n=89         | n=141        | n=178       | n=132       | n=201       |
| <b>PROPIONATE (UG/G)</b> | 24.9 ± 12.4  | 10.7 ± 6.3   | 10.3 ± 5.9  | 14.6 ± 8.1  | 9.1 ± 6.1   |
| <b>BUTYRATE (UG/G)</b>   | 18.7 ± 10.2  | 8.7 ± 5.0    | 7.7 ± 5.6   | 6.6 ± 3.3   | 9.0 ± 6.1   |
| <b>ACETATE (UG/G)</b>    | 48.7 ± 16.9  | 13.2 ± 4.9   | 21.6 ± 9.5  | 34.9 ± 16.8 | 16.0 ± 10.1 |
| <b>TOTAL SCFA (UG/G)</b> | 93.9 ± 33.9  | 34.1 ± 14.5  | 40.9 ± 18.0 | 57.1 ± 24.0 | 35.4 ± 19.9 |

Data are presented as mean ± standard deviation. Source data are provided as a Source Data file.

**Supplementary Table 14. Associations between concentrations of the different types of fecal short chain fatty acids (SCFAs) with alpha diversity and BMI within each country**

|         |            | Ghana |      | South Africa |      | Jamaica |      | Seychelles |      | USA   |      |
|---------|------------|-------|------|--------------|------|---------|------|------------|------|-------|------|
|         |            | r     | p    | r            | p    | r       | p    | r          | p    | r     | p    |
| BMI     | Total      |       |      |              |      |         |      |            |      |       |      |
|         | SCFA       | 0.01  | 0.82 | -0.02        | 0.73 | 0.08    | 0.16 | 0.02       | 0.76 | 0.07  | 0.20 |
| Shannon | Total      | -0.04 | 0.44 | -0.11        | 0.05 | -0.01   | 0.03 | -0.10      | 0.06 | 0.06  | 0.27 |
|         | Observed   |       |      |              |      |         |      |            |      |       |      |
| Shannon | SCFA       | -0.12 | 0.03 | -0.19        | 0.00 | -0.29   | 0.00 | -0.20      | 0.00 | -0.17 | 0.00 |
|         | Observed   | 0.05  | 0.33 | -0.03        | 0.57 | -0.21   | 0.00 | -0.11      | 0.03 | 0.04  | 0.51 |
| Shannon | Acetate    | -0.01 | 0.84 | -0.07        | 0.17 | -0.35   | 0.00 | -0.19      | 0.00 | -0.18 | 0.00 |
|         | Observed   | -0.10 | 0.06 | -0.14        | 0.01 | 0.02    | 0.77 | -0.05      | 0.36 | 0.08  | 0.19 |
| Shannon | Butyrate   | -0.20 | 0.00 | -0.25        | 0.00 | -0.14   | 0.01 | -0.10      | 0.05 | -0.10 | 0.07 |
|         | Observed   | -0.14 | 0.01 | -0.16        | 0.00 | 0.06    | 0.28 | -0.10      | 0.05 | 0.03  | 0.61 |
| Shannon | Propionate | -0.18 | 0.00 | -0.26        | 0.00 | -0.13   | 0.02 | -0.23      | 0.00 | -0.21 | 0.00 |
|         | Observed   | 0.41  | 0.00 | 0.14         | 0.01 | 0.19    | 0.00 | 0.21       | 0.00 | 0.12  | 0.04 |
| Shannon | Valerate   | 0.46  | 0.00 | 0.24         | 0.00 | 0.32    | 0.00 | 0.32       | 0.00 | 0.19  | 0.00 |
|         | Observed   |       |      |              |      |         |      |            |      |       |      |

r = Spearman correlation, BMI = body mass index, SCFA = short chain fatty acids

**Supplementary Table 15: The effect of short chain fatty acids on obesity through the mediating effects of Shannon diversity in the entire cohort**

|                   | Estimate | 95% CI<br>lower | 95% CI<br>upper | p value |
|-------------------|----------|-----------------|-----------------|---------|
| ACME              | 0        | 0               | 0               | 1       |
| ADE               | -0.0003  | -0.0004         | 0               | < 2e-16 |
| Total effect      | -0.0003  | -0.0004         | 0               | < 2e-16 |
| Prop.<br>mediated | 0        | 0               | 0               | 1       |

Bootstrap 95% confidence interval with the percentile method (Mediation test, two-sided). Exact p-values are provided. n= 1655. ACME = Average Causal Mediation Effects; ADE = Average Direct Effects; Prop. mediated = Proportion mediated. CI = Confidence Interval

# Supplementary Fig 1. Differentially abundant taxa among countries

**a**

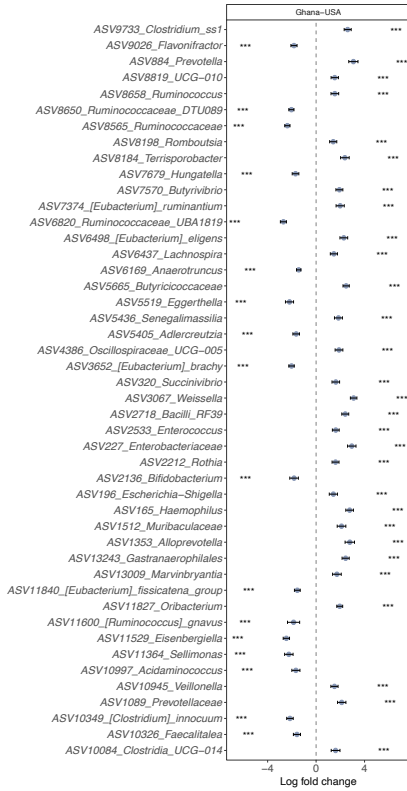

**b**

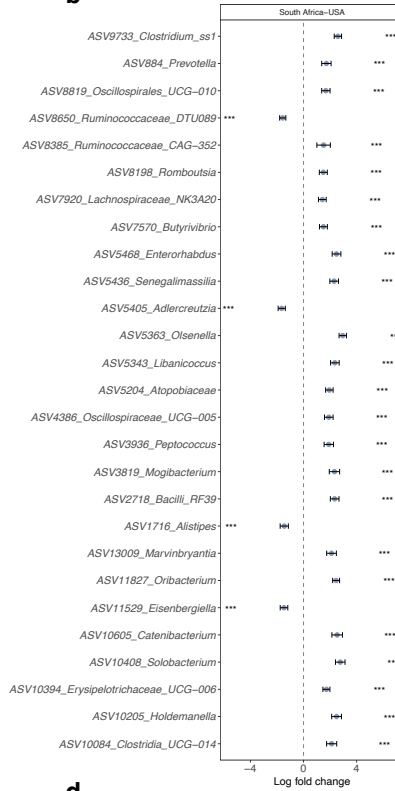

**c**

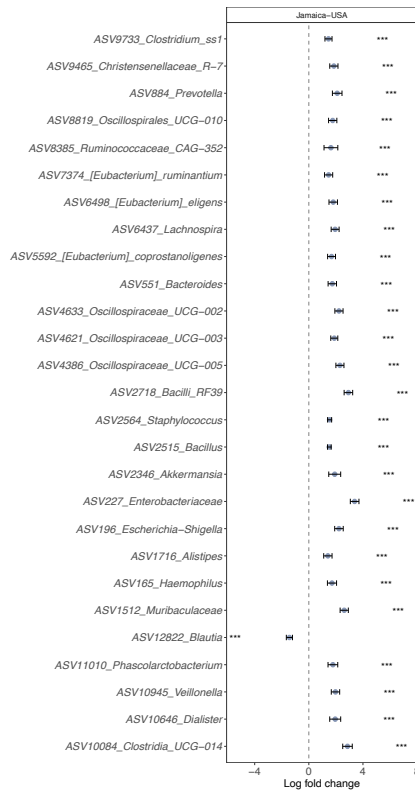

**d**

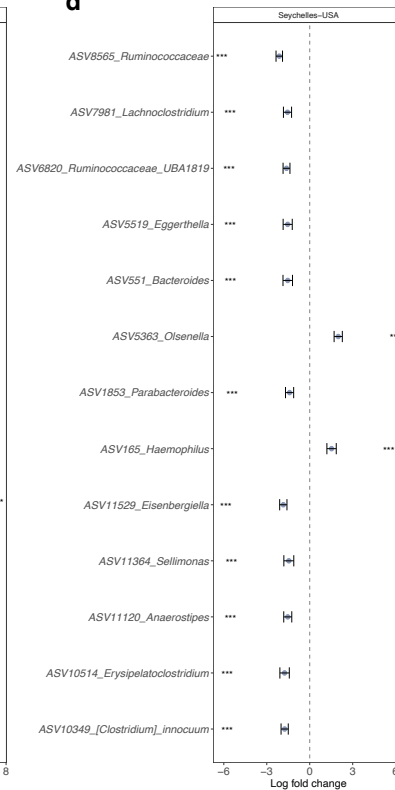

**(a-d)** Differentially abundant taxa among countries with US as the reference. ANCOM-BC analyses adjusted for BMI, age, and sex. Data are presented by effect size (log fold change) with 95% confidence interval (CI) calculated from the beta coefficient (effect size) and standard errors estimated from the ANCOM-BC log-linear model (two-sided; FDR-adjusted). Colored dot indicates effect size (log fold change) and whiskers indicate 95% CI. ASVs with log fold change >1.4 are shown for country. FDR-adjusted ( $q < 0.05$ ) effect sizes are indicated by \*, \*\* and \*\*\*, corresponding to  $q < 0.05$ ,  $<0.01$  and  $<0.001$  respectively. The exact  $p$ -values are available in the source data file.  $n = 1694$  samples. Source data are provided as a Source Data file. BMI = Body Mass Index. ANCOM-BC = Analysis of Compositions of Microbiomes with Bias Correction. FDR= False Discovery Rate.

## Supplementary Fig. 2. Heatmap representations of the 30 most predictive microbial features identified by Random Forest analysis

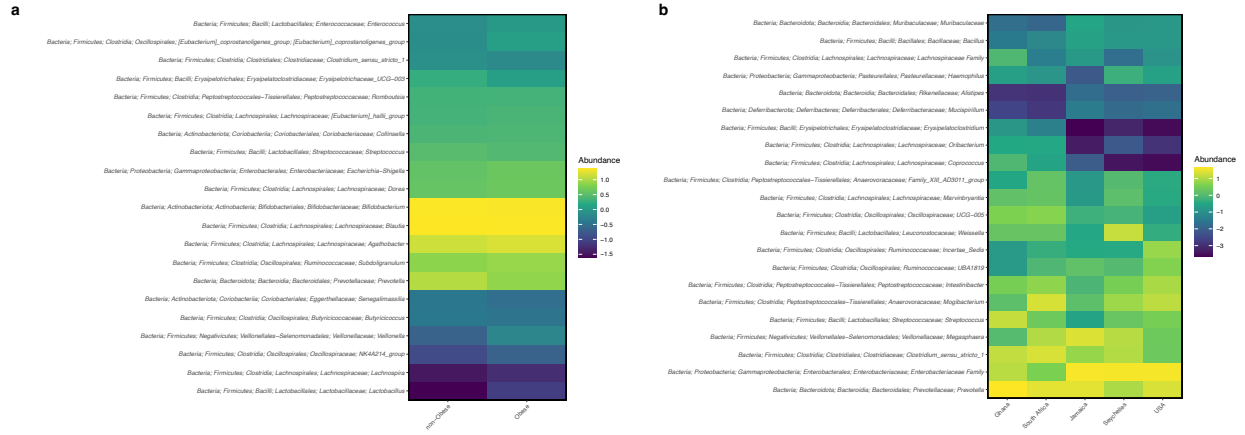

**a** Heatmap of predictive microbial features classifying countries. **b** Heatmap of predictive microbial features classifying obese and non-obese groups. Microbial features in rows. Source data are provided as a Source Data file. n= 1694 samples



### Supplementary Fig. 3. Variation in predicted PICRUSt2 MetaCyc pathways

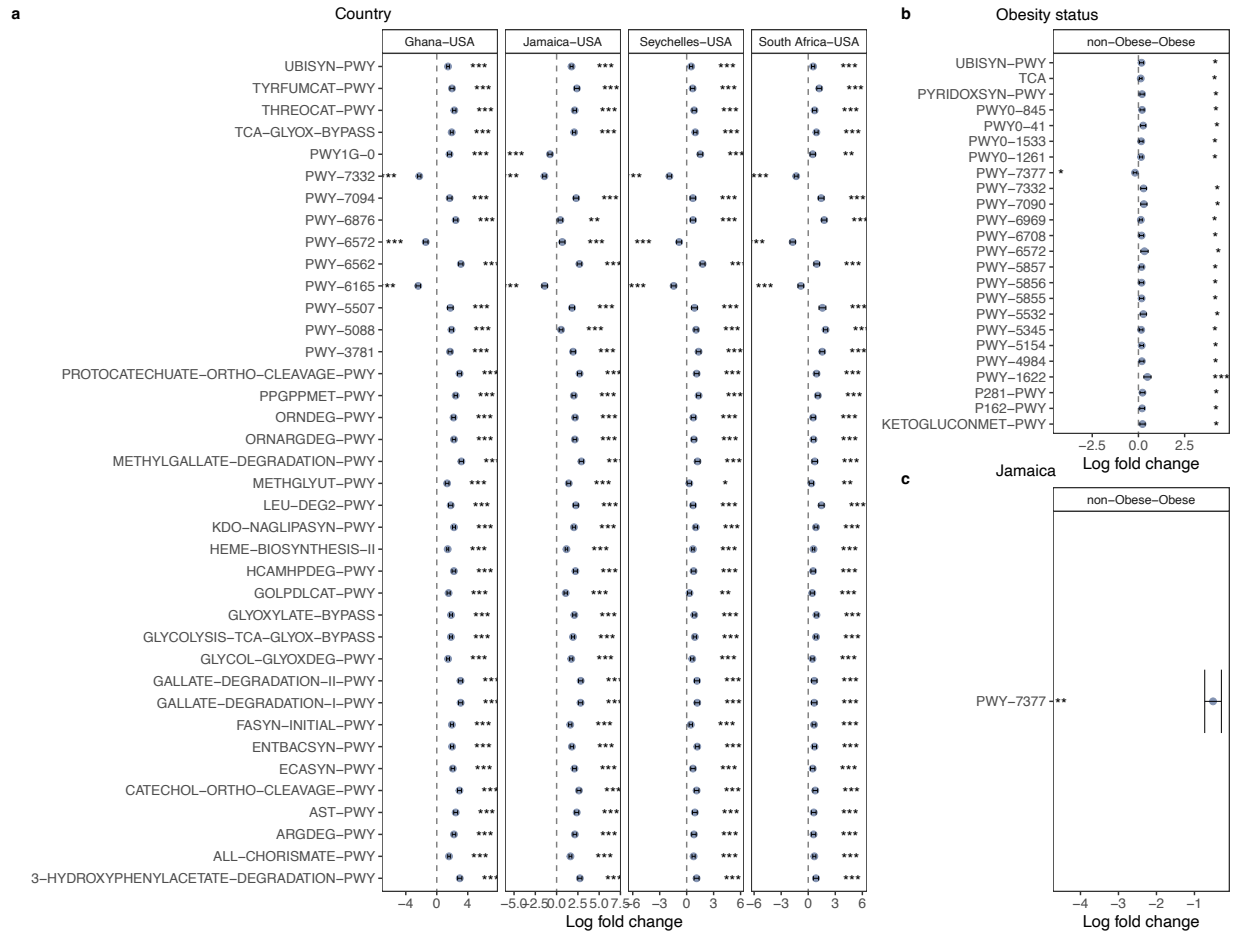

**a** Differentially abundant predicted MetaCyc pathways among countries with US as the reference (n = 1694). **b** Differentially abundant predicted MetaCyc pathways between obese and non-obese group in entire cohort (n = 1694). **c** Differentially abundant predicted MetaCyc pathways between obese and non-obese group within Jamaica (n = 361). ANCOM-BC analyses adjusted for BMI, age, sex and country. Data are presented by effect size (log fold change) with 95% confidence interval (CI) calculated from the beta coefficient (effect size) and standard errors estimated from the ANCOM-BC log-linear model (two-sided; FDR-adjusted). Colored dot indicates effect size (log fold change) and whiskers indicate 95% CI. Representative predicted pathways with log fold change >1.4 in at least one group are shown for country. FDR-adjusted (q < 0.05) effect sizes are indicated by \*, \*\* and \*\*\*, corresponding to q < 0.05, <0.01 and <0.001 respectively. The exact p-values are available in the source data file. Source data are provided as a Source Data file. BMI = Body Mass Index. ANCOM-BC = Analysis of Compositions of Microbiomes with Bias Correction. FDR= False Discovery Rate

## Supplementary Fig. 4. Variation in predicted PICRUSt2 KEGG orthology in butanoate metabolism pathway

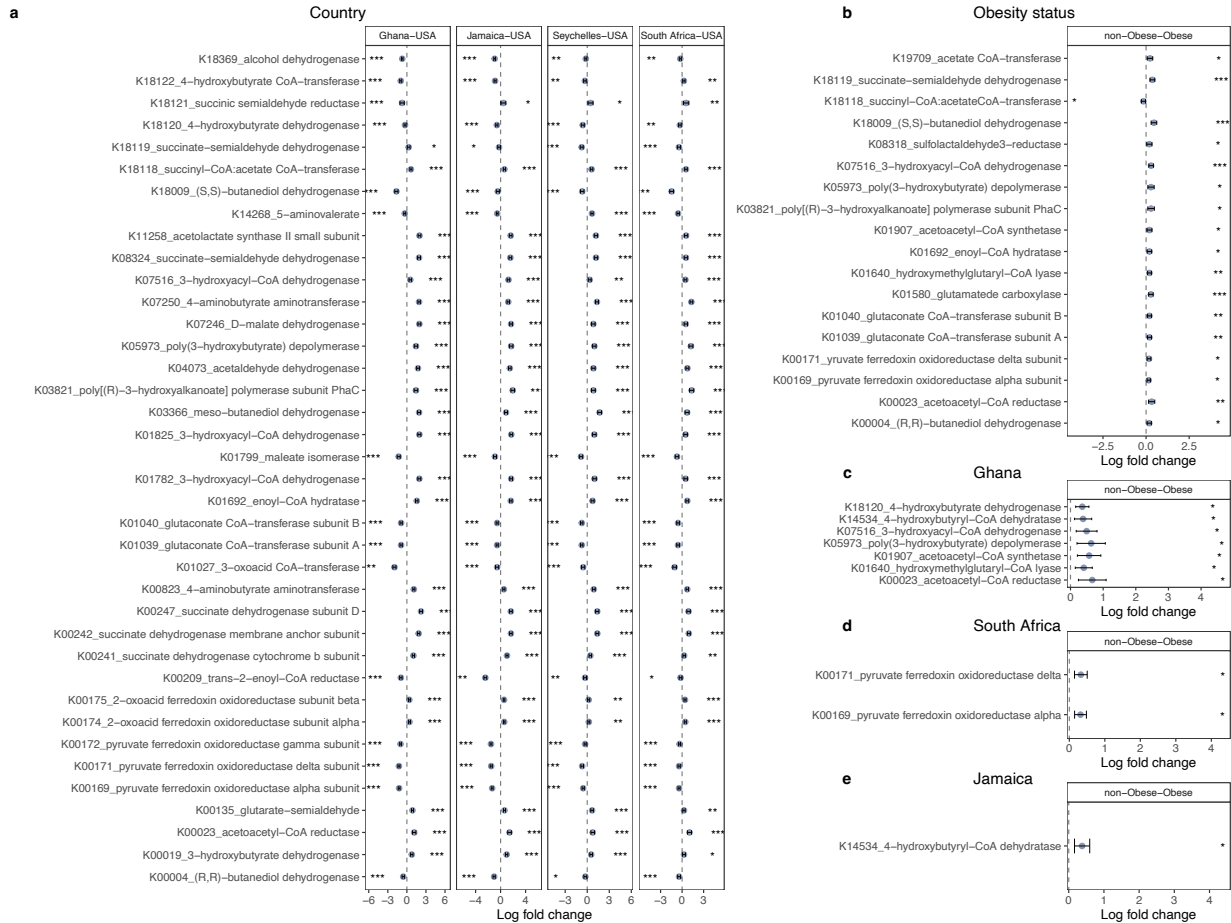

(a) Differentially abundant predicted butanoate KO among countries with US as the reference (n = 1694). (b) Differentially abundant butanoate KO between obese and non-obese group in entire cohort. Differentially abundant butanoate KO between obese and non-obese group within (c) Ghana (n = 328); (d) South Africa (n = 374); (e) Jamaica (n = 361). ANCOM-BC analyses adjusted for BMI, age, sex and country using ANCOM-BC. Data are presented by effect size (log fold change) with 95% confidence interval (CI) calculated from the beta coefficient (effect size) and standard errors estimated from the ANCOM-BC log-linear model (two-sided; FDR-adjusted). Colored dot indicates effect size (log fold change) and whiskers indicate 95% CI. Representative predicted pathways with log fold change >1.4 in at least one group are shown for country. FDR-adjusted (q < 0.05) effect sizes are indicated by \*, \*\* and \*\*\*, corresponding to q < 0.05, <0.01 and <0.001 respectively. The exact p-values are available in the source data file. Source data are provided as a Source Data file. KO = KEGG orthology. BMI = Body Mass Index. ANCOM-BC = Analysis of Compositions of Microbiomes with Bias Correction. FDR= False Discovery Rate

**Supplementary Fig. 5. Variation in predicted PICRUSt2 KEGG orthology in LPS biosynthesis pathway**

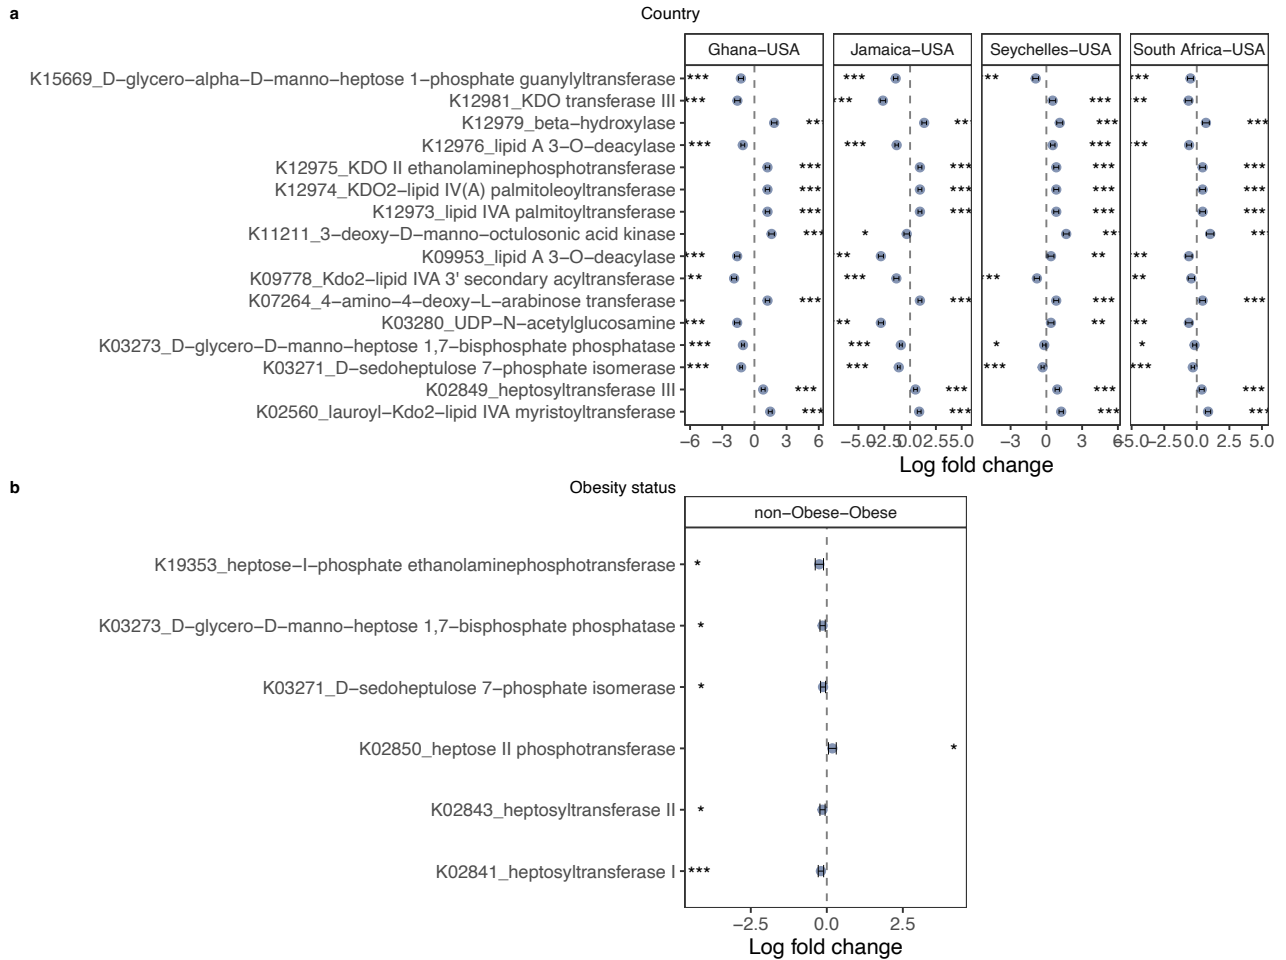

(a) Differentially abundant predicted LPS KO among countries with US as the reference. (b) Differentially abundant LPS KO between obese and non-obese group in entire cohort. ANCOM-BC analyses adjusted for BMI, age, sex and country. Data are presented by effect size (log fold change) with 95% confidence interval (CI) calculated from the beta coefficient and standard errors estimated from the ANCOM-BC log-linear model (two-sided; FDR-adjusted). Colored dot indicates effect size (log fold change) and whiskers indicate 95% CI. Representative predicted pathways are shown for country. FDR-adjusted ( $q < 0.05$ ) effect sizes are indicated by \*, \*\* and \*\*\*, corresponding to  $q < 0.05$ ,  $< 0.01$  and  $< 0.001$  respectively. The exact  $p$ -values are available in the source data file.  $n = 1694$  samples. Source data are provided as a Source Data file. BMI = Body Mass Index. KO = KEGG orthology. LPS = Lipopolysaccharides. ANCOM-BC = Analysis of Compositions of Microbiomes with Bias Correction. FDR= False Discovery Rate.

**Supplementary Figure 6. The utility of SCFAs to predict obesity using an XGBoost machine learning model.**

|               | Total SCFA | Acetate | Butyrate | Propionate | Valerate |
|---------------|------------|---------|----------|------------|----------|
| Entire cohort | 0.55       | 0.53    | 0.52     | 0.53       | 0.51     |
| Ghana         | 0.51       | 0.53    | 0.46     | 0.49       | 0.60     |
| South Africa  | 0.51       | 0.51    | 0.51     | 0.55       | 0.54     |
| Jamaica       | 0.56       | 0.56    | 0.51     | 0.49       | 0.55     |
| Seychelles    | 0.44       | 0.53    | 0.51     | 0.53       | 0.40     |
| USA           | 0.48       | 0.52    | 0.51     | 0.51       | 0.48     |

The model was tested with 10-fold cross validation in 100 repetitions and the average AUC (area under the receiver operating characteristic curve) for the entire cohort or at each site is presented. Color gradient (red to deep green) represents increasing average AUC values. red: 0.40 – 0.43; light red: 0.44 – 0.46; orange: 0.47 – 0.49; yellow: 0.50 – 0.52; light green: 0.53 – 0.54; green: 0.55 – 0.56; deep green: 0.60. SCFAs = Short chain fatty acids.
